# Supplementary material for: Saliva Diagnosis as a Disease Predictor
Source: PubMed Central journal article supplement (PMC7074189; doi:10.3390/jcm9020377), 2020-01-30
Supplement: jcm-09-00377-s001.pdf [file jcm-09-00377-s001.pdf]

## Supplemental Tables

Supplemental Table 1. Salivary Abeta42 levels.

| Low Control |     |        |           |                   |
|-------------|-----|--------|-----------|-------------------|
| Case No.    | Age | Gender | Diagnosis | A $\beta$ (pg/ml) |
| 1           | 45  | F      | N         | 22.56             |
| 2           | 54  | M      | N         | 22.32             |
| 3           | 40  | F      | N         | 19.63             |
| 4           | 15  | M      | N         | 18.66             |
| 5           | 53  | F      | N         | 20.56             |
| 6           | 89  | F      | N         | 19.73             |
| 7           | 88  | M      | N         | 22.15             |
| 8           | 55  | M      | N         | 20.93             |
| 9           | 32  | F      | N         | 23.04             |
| 10          | 42  | F      | N         | 20.57             |
| 11          | 45  | M      | N         | 22.48             |
| 12          | 45  | F      | N         | 22.46             |
| 13          | 54  | M      | N         | 19.93             |
| 14          | 10  | M      | N         | 21.54             |
| 15          | 56  | M      | N         | 22.81             |
| 16          | 76  | M      | N         | 22.21             |
| 17          | 88  | F      | N         | 19.83             |
| 18          | 62  | F      | N         | 20.34             |
| 19          | 83  | F      | N         | 20.56             |
| 20          | 18  | M      | N         | 22.49             |
| 21          | 57  | M      | N         | 21.94             |
| 22          | 53  | F      | N         | 22.58             |
| 23          | 40  | F      | N         | 20.82             |
| 24          | 17  | M      | N         | 21.47             |
| 25          | 46  | M      | N         | 21.45             |
| 26          | 54  | M      | N         | 19.58             |
| 27          | 81  | M      | N         | 21.37             |
| 28          | 57  | F      | N         | 23.07             |
| 29          | 81  | M      | N         | 19.54             |
| 30          | 59  | F      | N         | 20.23             |
| 31          | 24  | M      | N         | 19.34             |
| 32          | 54  | F      | N         | 20.59             |
| 33          | 56  | M      | N         | 21.66             |
| 34          | 78  | F      | N         | 22.28             |
| 35          | 42  | F      | N         | 20.45             |
| 36          | 34  | F      | N         | 20.48             |
| 37          | 35  | M      | N         | 19.83             |
| 38          | 54  | M      | N         | 24.44             |
| 39          | 48  | M      | N         | 21.32             |
| 40          | 90  | M      | N         | 22.35             |
| 41          | 71  | M      | N         | 22.19             |
| 42          | 22  | M      | N         | 19.23             |
| 43          | 19  | M      | N         | 18.12             |
| 44          | 25  | F      | N         | 19.58             |
| 45          | 57  | M      | N         | 20.63             |
| 46          | 59  | F      | N         | 21.47             |
| 47          | 28  | F      | N         | 21.08             |
| 48          | 45  | M      | N         | 21.24             |
| 49          | 49  | M      | N         | 22.51             |

|     |    |   |   |       |
|-----|----|---|---|-------|
| 50  | 55 | M | N | 21.56 |
| 51  | 81 | F | N | 21.47 |
| 52  | 81 | M | N | 20.44 |
| 53  | 86 | M | N | 21.94 |
| 54  | 69 | M | N | 20.84 |
| 55  | 88 | M | N | 22.46 |
| 56  | 43 | F | N | 21.35 |
| 57  | 54 | M | N | 22.56 |
| 58  | 52 | M | N | 20.33 |
| 59  | 53 | M | N | 21.28 |
| 60  | 55 | F | N | 32.31 |
| 61  | 54 | M | N | 21.42 |
| 62  | 49 | F | N | 20.67 |
| 63  | 40 | M | N | 23.56 |
| 64  | 48 | F | N | 21.65 |
| 65  | 51 | M | N | 22.27 |
| 66  | 47 | F | N | 21.29 |
| 67  | 66 | F | N | 20.34 |
| 68  | 77 | M | N | 27.34 |
| 69  | 47 | F | N | 22.37 |
| 70  | 52 | M | N | 21.35 |
| 71  | 74 | F | N | 20.59 |
| 72  | 78 | M | N | 22.38 |
| 73  | 12 | M | N | 21.16 |
| 74  | 16 | M | N | 21.47 |
| 75  | 19 | F | N | 19.73 |
| 76  | 22 | M | N | 22.27 |
| 77  | 24 | M | N | 21.53 |
| 78  | 39 | M | N | 22.22 |
| 79  | 42 | M | N | 20.58 |
| 80  | 47 | F | N | 20.15 |
| 81  | 55 | F | N | 29.66 |
| 82  | 59 | M | N | 21.55 |
| 83  | 60 | M | N | 22.02 |
| 84  | 62 | M | N | 21.37 |
| 85  | 78 | M | N | 21.44 |
| 86  | 92 | F | N | 20.89 |
| 87  | 67 | M | N | 24.63 |
| 88  | 52 | F | N | 23.78 |
| 89  | 93 | M | N | 20.55 |
| 90  | 95 | F | N | 20.38 |
| 91  | 84 | M | N | 19.46 |
| 92  | 46 | F | N | 20.27 |
| 93  | 48 | M | N | 18.93 |
| 94  | 79 | F | N | 19.44 |
| 95  | 54 | F | N | 20.58 |
| 96  | 87 | M | N | 19.66 |
| 97  | 41 | M | N | 19.21 |
| 98  | 84 | M | N | 19.45 |
| 99  | 16 | M | N | 18.66 |
| 100 | 52 | F | N | 19.66 |
| 101 | 52 | F | N | 20.93 |
| 102 | 52 | F | N | 18.16 |
| 103 | 84 | F | N | 19.07 |
| 104 | 52 | F | N | 19.05 |
| 105 | 52 | F | N | 20.59 |

|              |    |   |   |              |
|--------------|----|---|---|--------------|
| 106          | 68 | M | N | 20.23        |
| 107          | 51 | F | N | 21.33        |
| 108          | 40 | F | N | 21.33        |
| 109          | 47 | F | N | 21.11        |
| 110          | 53 | M | N | 21.53        |
| 111          | 63 | F | N | 20.88        |
| 112          | 61 | F | N | 19.93        |
| 113          | 44 | M | N | 20.18        |
| 114          | 61 | M | N | 21.35        |
| 115          | 59 | F | N | 21.76        |
| 116          | 71 | M | N | 20.63        |
| 117          | 56 | M | N | 22.05        |
| 118          | 52 | F | N | 20.57        |
| 119          | 22 | M | N | 19.23        |
| 120          | 66 | F | N | 22.27        |
| 121          | 93 | F | N | 21.07        |
| 122          | 63 | M | N | 21.11        |
| 123          | 31 | F | N | 21.36        |
| 124          | 81 | M | N | 20.13        |
| 125          | 77 | M | N | 22.42        |
| 126          | 60 | F | N | 20.25        |
| 127          | 70 | F | N | 21.21        |
| 128          | 67 | F | N | 22.19        |
| 129          | 70 | M | N | 21.07        |
| 130          | 45 | F | N | 22.17        |
| 131          | 76 | M | N | 23.18        |
| 132          | 63 | F | N | 20.66        |
| 133          | 33 | M | N | 22.11        |
| 134          | 42 | M | N | 20.25        |
| 135          | 42 | F | N | 21.05        |
| 136          | 14 | M | N | 20.25        |
| 137          | 56 | F | N | 21.42        |
| 138          | 76 | F | N | 22.16        |
| 139          | 43 | F | N | 20.94        |
| 140          | 58 | M | N | 21.18        |
| 141          | 63 | M | N | 22.17        |
| 142          | 51 | F | N | 21.14        |
| 143          | 75 | F | N | 22.06        |
| 144          | 74 | M | N | 20.36        |
| 145          | 76 | M | N | 19.62        |
| 146          | 79 | F | N | 21.26        |
| 147          | 47 | F | N | 20.94        |
| 148          | 40 | F | N | 22.43        |
| Mean ± SD    |    |   |   | 21.26 ± 1.73 |
| High Control |    |   |   |              |
| 1            | 22 | F | N | 55.79        |
| 2            | 73 | M | N | 35.86        |
| 3            | 75 | M | N | 30.94        |
| 4            | 91 | F | N | 64.35        |
| 5            | 79 | M | N | 45.28        |
| 6            | 49 | M | N | 42.46        |
| 7            | 12 | M | N | 55.37        |
| 8            | 22 | F | N | 55.79        |
| 9            | 73 | M | N | 35.86        |
| 10           | 55 | F | N | 40.44        |
| 11           | 75 | M | N | 30.94        |

|    |    |   |   |       |
|----|----|---|---|-------|
| 12 | 49 | F | N | 55.79 |
| 13 | 70 | M | N | 31.48 |
| 14 | 91 | F | N | 64.35 |
| 15 | 79 | M | N | 45.28 |
| 16 | 71 | M | N | 31.47 |
| 17 | 76 | M | N | 52.45 |
| 18 | 49 | M | N | 42.46 |
| 19 | 69 | F | N | 32.73 |
| 20 | 45 | M | N | 30.34 |
| 21 | 57 | F | N | 47.96 |
| 22 | 77 | F | N | 52.45 |
| 23 | 72 | F | N | 48.31 |
| 24 | 71 | M | N | 41.83 |
| 25 | 59 | M | N | 32.68 |
| 26 | 60 | F | N | 41.12 |
| 27 | 64 | M | N | 39.66 |
| 28 | 58 | M | N | 32.27 |
| 29 | 49 | M | N | 39.94 |
| 30 | 76 | F | N | 34.63 |
| 31 | 79 | F | N | 32.55 |
| 32 | 80 | M | N | 31.69 |
| 33 | 44 | M | N | 30.18 |
| 34 | 52 | F | N | 31.44 |
| 35 | 76 | F | N | 34.57 |
| 36 | 79 | F | N | 37.16 |
| 37 | 72 | M | N | 35.91 |
| 38 | 56 | F | N | 48.33 |
| 39 | 51 | F | N | 51.25 |
| 40 | 71 | F | N | 41.18 |
| 41 | 64 | F | N | 28.84 |
| 42 | 72 | M | N | 48.44 |
| 43 | 49 | M | N | 30.95 |
| 44 | 63 | M | N | 35.22 |
| 45 | 71 | F | N | 41.17 |
| 46 | 59 | M | N | 38.88 |
| 47 | 79 | M | N | 42.91 |
| 48 | 44 | F | N | 40.16 |
| 49 | 66 | M | N | 38.11 |
| 50 | 74 | F | N | 35.96 |
| 51 | 86 | M | N | 46.91 |
| 52 | 21 | M | N | 31.28 |
| 53 | 25 | F | N | 38.17 |
| 54 | 53 | F | N | 40.16 |
| 55 | 62 | F | N | 35.48 |
| 56 | 41 | M | N | 37.72 |
| 57 | 58 | M | N | 41.12 |
| 58 | 69 | M | N | 30.27 |
| 59 | 71 | F | N | 28.93 |
| 60 | 73 | F | N | 31.46 |
| 61 | 75 | M | N | 32.89 |
| 62 | 54 | F | N | 33.42 |
| 63 | 49 | F | N | 35.37 |
| 64 | 49 | F | N | 31.17 |
| 65 | 49 | F | N | 31.47 |
| 66 | 69 | F | N | 34.44 |
| 67 | 24 | F | N | 37.45 |

|           |    |   |    |               |
|-----------|----|---|----|---------------|
| 68        | 25 | M | N  | 33.14         |
| 69        | 55 | F | N  | 35.17         |
| 70        | 48 | M | N  | 38.87         |
| 71        | 78 | F | N  | 37.84         |
| 72        | 44 | F | N  | 33.16         |
| 73        | 49 | M | N  | 35.86         |
| 74        | 47 | F | N  | 31.27         |
| 75        | 65 | M | N  | 32.47         |
| 76        | 41 | F | N  | 38.97         |
| 77        | 54 | F | N  | 29.22         |
| 78        | 47 | F | N  | 37.83         |
| 79        | 52 | M | N  | 33.14         |
| 80        | 58 | F | N  | 29.59         |
| 81        | 76 | F | N  | 31.12         |
| 82        | 59 | F | N  | 30.78         |
| 83        | 44 | M | N  | 33.28         |
| 84        | 14 | F | N  | 29.11         |
| 85        | 53 | F | N  | 27.73         |
| 86        | 65 | M | N  | 35.73         |
| 87        | 92 | F | N  | 41.19         |
| 88        | 55 | F | N  | 29.55         |
| 89        | 59 | M | N  | 30.93         |
| Mean ± SD |    |   |    | 37.96 ± 8.13  |
| AD        |    |   |    |               |
| 1         | 60 | F | AD | 47.96         |
| 2         | 86 | F | AD | 75.2          |
| 3         | 57 | M | AD | 41.58         |
| 4         | 52 | F | AD | 59.57         |
| 5         | 77 | F | AD | 84.97         |
| 6         | 84 | F | AD | 64.93         |
| 7         | 86 | F | AD | 69.83         |
| 8         | 78 | M | AD | 44.22         |
| 9         | 72 | F | AD | 42.33         |
| 10        | 91 | M | AD | 52.17         |
| 11        | 84 | M | AD | 49.94         |
| 12        | 78 | F | AD | 55.93         |
| 13        | 75 | F | AD | 47.93         |
| 14        | 75 | F | AD | 60.68         |
| 15        | 74 | M | AD | 63.73         |
| 16        | 8  | M | AD | 42.77         |
| 17        | 72 | F | AD | 45.95         |
| 18        | 64 | F | AD | 53.38         |
| 19        | 48 | F | AD | 49.26         |
| 20        | 61 | M | AD | 62.44         |
| 21        | 78 | F | AD | 58.28         |
| 22        | 83 | M | AD | 44.19         |
| 23        | 80 | F | AD | 51.11         |
| 24        | 79 | M | AD | 49.07         |
| 25        | 84 | F | AD | 46.62         |
| 26        | 74 | F | AD | 44.62         |
| 27        | 80 | M | AD | 55.83         |
| 28        | 74 | F | AD | 59.66         |
| 29        | 81 | F | AD | 41.62         |
| 30        | 78 | M | AD | 55.18         |
| Mean ± SD |    |   |    | 51.70 ± 10.50 |

**Supplemental Table 1.** Abeta42 levels of low level control group (less than 23 pg/ml), high level control group (higher than 30 pg/ml) and AD were tested. N: normal group and AD: Alzheimer disease group. Averages and SD were  $21.26 \pm 1.73$  for low level controls (148 cases),  $37.96 \pm 8.13$  for high level controls (89 cases) and  $51.70 \pm 10.50$  for AD cases (30 cases). One-way ANOVA was carried out to test significance for data. Multiple group comparisons were followed by a *post-hoc* Bonferroni t-test.;  $P < 0.01$  between low level control group and, high level control group and AD group and  $P < 0.01$  between high level control groups and AD group.

Supplemental Table 2. Salivary CRP levels.

| Case No.                 | Age | Gender | Diagnosis           | CRP (ng/ml) |
|--------------------------|-----|--------|---------------------|-------------|
| Low level control group  |     |        |                     |             |
| 1                        | 35  | M      | N                   | 1.97        |
| 2                        | 28  | F      | N                   | 1.94        |
| 3                        | 86  | M      | N                   | 1.88        |
| 4                        | 66  | F      | N                   | 1.88        |
| 5                        | 47  | F      | N                   | 1.88        |
| 6                        | 78  | F      | N                   | 1.85        |
| 7                        | 57  | M      | Type II diabetes    | 1.83        |
| 8                        | 81  | F      | Parkinson's Disease | 1.84        |
| 9                        | 52  | M      | N                   | 1.83        |
| 10                       | 42  | F      | N                   | 1.81        |
| 11                       | 87  | M      | N                   | 1.79        |
| 12                       | 59  | F      | N                   | 1.77        |
| 13                       | 22  | F      | N                   | 1.74        |
| 14                       | 49  | F      | N                   | 1.74        |
| 15                       | 12  | F      | N                   | 1.74        |
| 16                       | 53  | M      | N                   | 1.74        |
| 17                       | 24  | M      | N                   | 1.73        |
| 18                       | 55  | M      | N                   | 1.72        |
| 19                       | 55  | F      | N                   | 1.67        |
| 20                       | 56  | M      | N                   | 1.59        |
| 21                       | 74  | F      | N                   | 1.59        |
| 22                       | 73  | M      | N                   | 1.58        |
| 23                       | 48  | F      | N                   | 1.58        |
| 24                       | 47  | F      | N                   | 1.58        |
| 25                       | 59  | F      | N                   | 1.47        |
| 26                       | 43  | F      | N                   | 1.47        |
| 27                       | 54  | M      | N                   | 1.44        |
| 28                       | 90  | M      | N                   | 1.42        |
| 29                       | 54  | M      | N                   | 1.32        |
| 30                       | 48  | M      | N                   | 1.29        |
| 31                       | 89  | F      | N                   | 1.12        |
| Ave and SEM              |     |        |                     | 1.67 ± 0.21 |
| High level control group |     |        |                     |             |
| 1                        | 79  | M      | N                   | 8.82        |
| 2                        | 12  | M      | N                   | 8.37        |
| 3                        | 88  | M      | N                   | 7.92        |
| 4                        | 70  | M      | N                   | 7.45        |
| 5                        | 71  | M      | N                   | 7.37        |
| 6                        | 83  | M      | N                   | 6.26        |
| 7                        | 55  | F      | N                   | 5.93        |
| 8                        | 52  | M      | N                   | 5.93        |
| 9                        | 34  | F      | N                   | 5.85        |
| 10                       | 73  | F      | N                   | 5.84        |
| 11                       | 49  | F      | N                   | 5.83        |
| 12                       | 54  | M      | N                   | 5.72        |
| 13                       | 40  | M      | N                   | 5.72        |
| 14                       | 77  | M      | N                   | 5.58        |
| 15                       | 78  | M      | N                   | 5.55        |
| 16                       | 49  | M      | N                   | 4.84        |
| 17                       | 45  | M      | N                   | 4.57        |
| 18                       | 35  | F      | N                   | 4.45        |
| 19                       | 53  | M      | N                   | 3.62        |
| 20                       | 45  | M      | N                   | 3.58        |

|                |    |   |                          |              |
|----------------|----|---|--------------------------|--------------|
| 21             | 75 | M | N                        | 3.48         |
| 22             | 71 | M | N                        | 3.48         |
| 23             | 71 | F | N                        | 3.37         |
| 24             | 51 | M | N                        | 3.17         |
| 25             | 49 | M | N                        | 3.16         |
| 26             | 59 | M | N                        | 3.11         |
| Ave and SEM    |    |   |                          | 5.34 ± 1.70  |
| Diseased Group |    |   |                          |              |
| 1              | 84 | M | Heart Attack             | 32.70        |
| 2              | 88 | M | TIA                      | 16.95        |
| 3              | 59 | F | Peripheral nerve failure | 16.45        |
| 4              | 69 | M | Heart Attack             | 15.47        |
| 5              | 69 | F | Heart Attack             | 14.66        |
| 6              | 81 | M | Heart Attack             | 11.48        |
| 7              | 76 | M | Heart attack             | 9.93         |
| 8              | 77 | F | Giant cell Arthritis     | 9.93         |
| 9              | 54 | M | Heart Attack             | 9.21         |
| Ave and SEM    |    |   |                          | 15.20 ± 7.21 |

**Supplemental Table 2.** C-reactive proteins (CRPs) levels of low controls, high controls and diseased conditions were tested. Averages and SD were  $1.67 \pm 0.21$  for low level control group (31 cases),  $5.34 \pm 1.70$  for high level control group (26 cases) and  $15.20 \pm 7.21$  for diseased conditions (9 cases). One-way ANOVA was carried out to test significance for data. Multiple group comparisons were followed by a *post-hoc* Bonferroni t-test;  $P < 0.01$  between low level control group and, high level control group and diseased group and  $P < 0.01$  between high level control group and diseased group.



**Supplemental Table 3.** Salivary TNF levels.

| Case No      | Age | Gender | Diagnosis            | TNF (pg/ml)   |
|--------------|-----|--------|----------------------|---------------|
| Control      |     |        |                      |               |
| 1            | 54  | F      | N                    | 155.93        |
| 2            | 52  | M      | N                    | 168.11        |
| 3            | 53  | M      | N                    | 161.49        |
| 4            | 55  | M      | N                    | 166.48        |
| 5            | 43  | F      | N                    | 174.98        |
| 6            | 79  | M      | N                    | 162.69        |
| 7            | 54  | M      | N                    | 164.12        |
| 8            | 49  | F      | N                    | 156.17        |
| 9            | 71  | M      | N                    | 152.79        |
| 10           | 59  | M      | N                    | 157.92        |
| 11           | 77  | M      | N                    | 165.34        |
| 12           | 45  | M      | N                    | 156.34        |
| 13           | 47  | F      | N                    | 143.35        |
| 14           | 52  | M      | N                    | 166.51        |
| 15           | 74  | F      | N                    | 156.29        |
| 16           | 78  | M      | N                    | 146.93        |
| 17           | 12  | M      | N                    | 144.48        |
| 19           | 63  | F      | N                    | 159.62        |
| 20           | 59  | M      | N                    | 161.44        |
| 21           | 71  | M      | N                    | 162.56        |
| 22           | 59  | M      | N                    | 155.48        |
| 23           | 52  | F      | N                    | 161.61        |
| 24           | 58  | M      | N                    | 158.37        |
| 25           | 22  | M      | N                    | 161.26        |
| Ave and SEM  |     |        |                      | 159.18 ± 7.38 |
| Cancer cases |     |        |                      |               |
| 1            | 76  | M      | Leukemia             | 474.83        |
| 2            | 63  | M      | Lung cancer          | 296.44        |
| 3            | 70  | M      | Prostate cancer      | 311.36        |
| 4            | 81  | M      | Liver cancer         | 286.47        |
| 5            | 88  | M      | Colon Cancer         | 411.17        |
| 6            | 57  | F      | Ovarian cancer       | 397.17        |
| 7            | 65  | M      | Pancreatic<br>Cancer | 405.56        |
| 8            | 89  | F      | Glioma               | 431.66        |
| 9            | 54  | F      | Breast Cancer        | 295.63        |
| 10           | 67  | M      | Colon CSancer        | 406.68        |
| 11           | 70  | M      | Pancreatic<br>cancer | 288.47        |
| 12           | 70  | M      | Pancreatic<br>Cancer | 326.45        |
| 13           | 71  | M      | Prostate Cancer      | 368.37        |
| 14           | 64  | M      | Prostate Cancer      | 362.46        |
| 15           | 83  | F      | Breast Cancer        | 260.36        |
| 16           | 76  | M      | Stomach Cancer       | 378           |
| 17           | 77  | M      | Multiple<br>Myeloma  | 275           |
| Ave and SEM  |     |        |                      | 351.53 ± 63.8 |

**Supplemental Table 3.** TNF levels of control group and cancer cases were tested. Averages and SEM were 159.18 ± 7.38 for control group (25 cases) and 351.53 ± 63.8 for cancer cases (17 cases). The table shows salivary TNF levels for all the cancer cases suffering from advanced cancer. The values ranged from 260 pg/ml to 474 pg/ml. There was no overlap between normal and cancer cases. One-way ANOVA was carried out to test significance;  $P < 0.01$  between control group and cancer cases.
